# Supplementary material
Source: PubMed Central journal article supplement (PMC8173895)
Supplement: 13059_2021_2387_MOESM1_ESM.pdf [file 13059_2021_2387_MOESM1_ESM.pdf]

# Figure S1

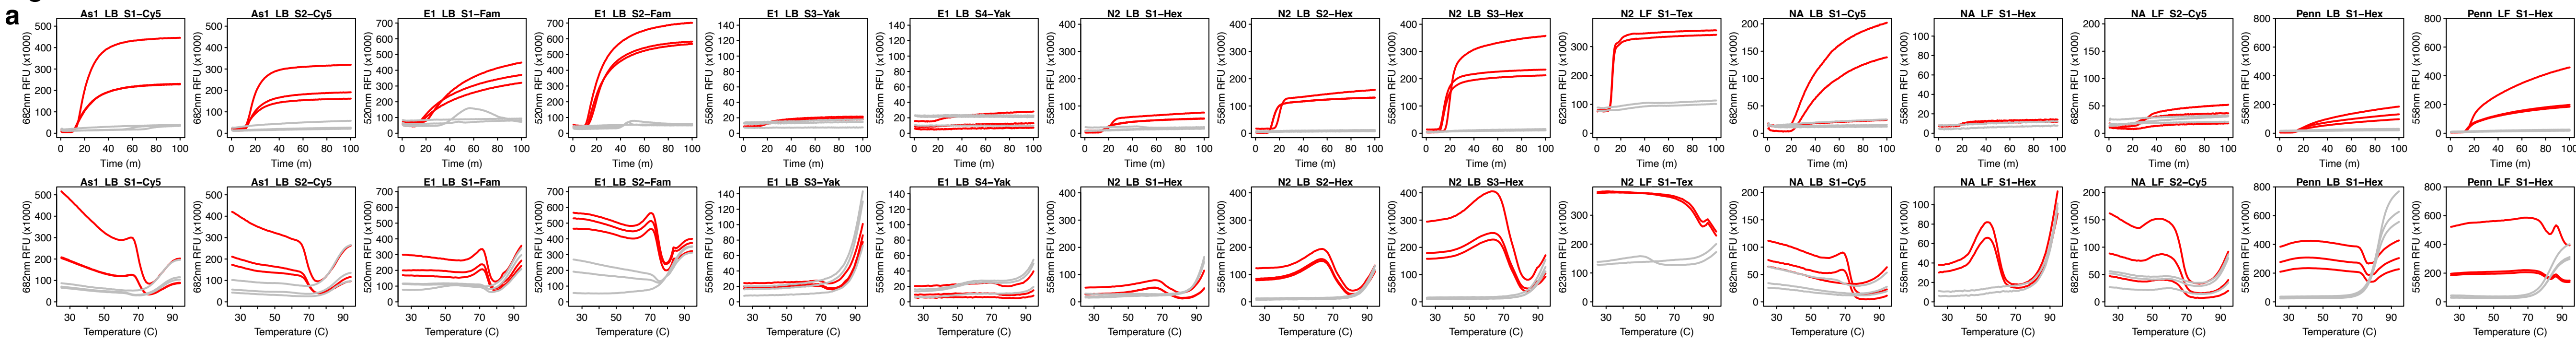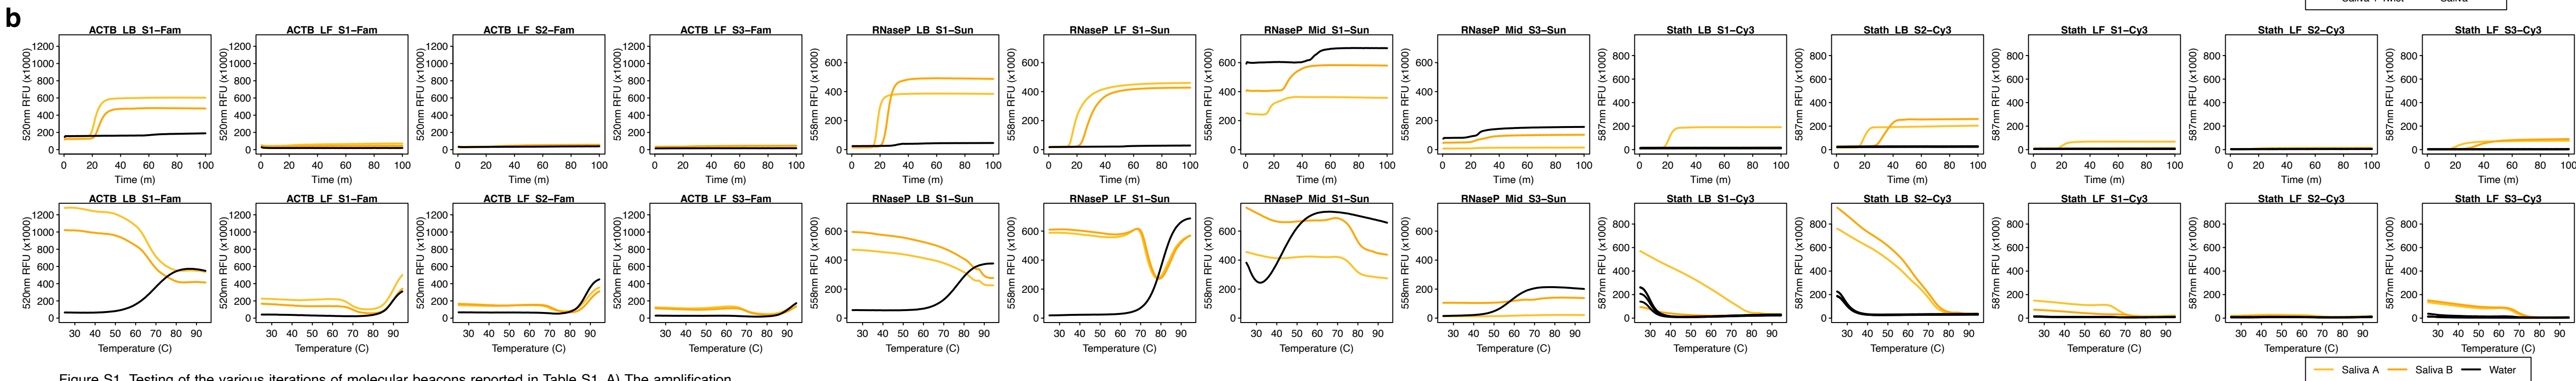

Figure S1. Testing of the various iterations of molecular beacons reported in Table S1. A) The amplification and melt curves of various SARS-CoV-2 targeted beacons. Each plot shows amplification and melt curves in reactions amplifying saliva (grey) or saliva doped with 10,000 copies of Twist synthetic SARS-CoV-2 RNA (red). Beacon and fluorophore identity is indicated above each plot. B) As in A but for beacons targeting human sequences. Amplification was performed on saliva from two different individuals (yellow or orange) or water (black).

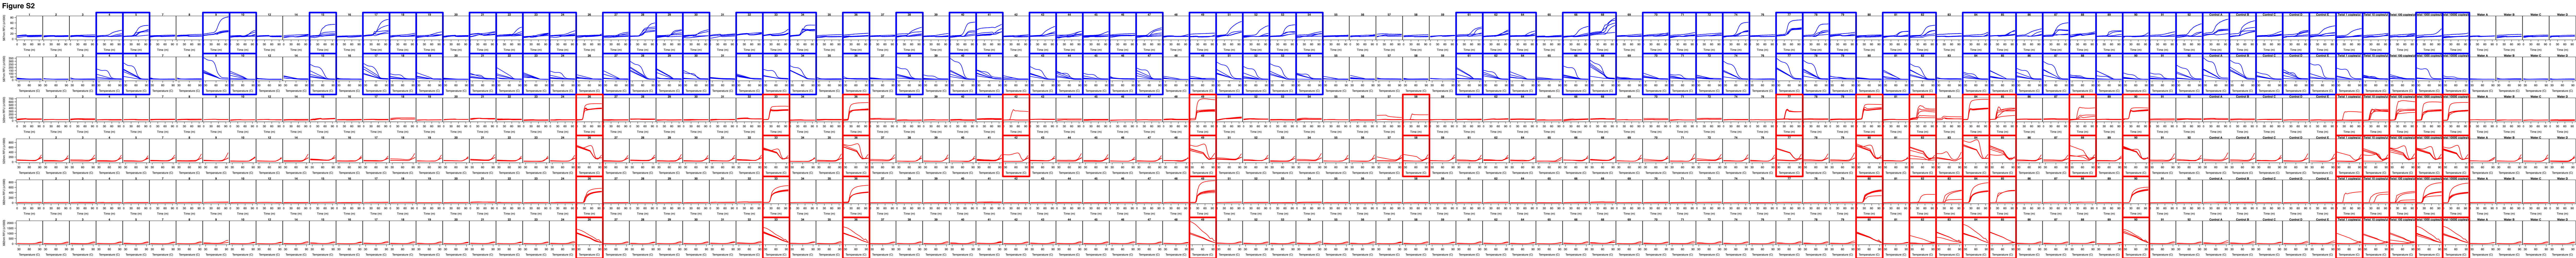

Figure S2. Reaction progression and melt curves for LAMP-BEAC reactions carried out on clinical saliva samples. Each column represents a single sample assayed. Sample names are as in Table S2. Heavy boxes indicate samples called positive for that amplicon.



**Figure S3****Lab-purified polymerases****Commercial polymerases**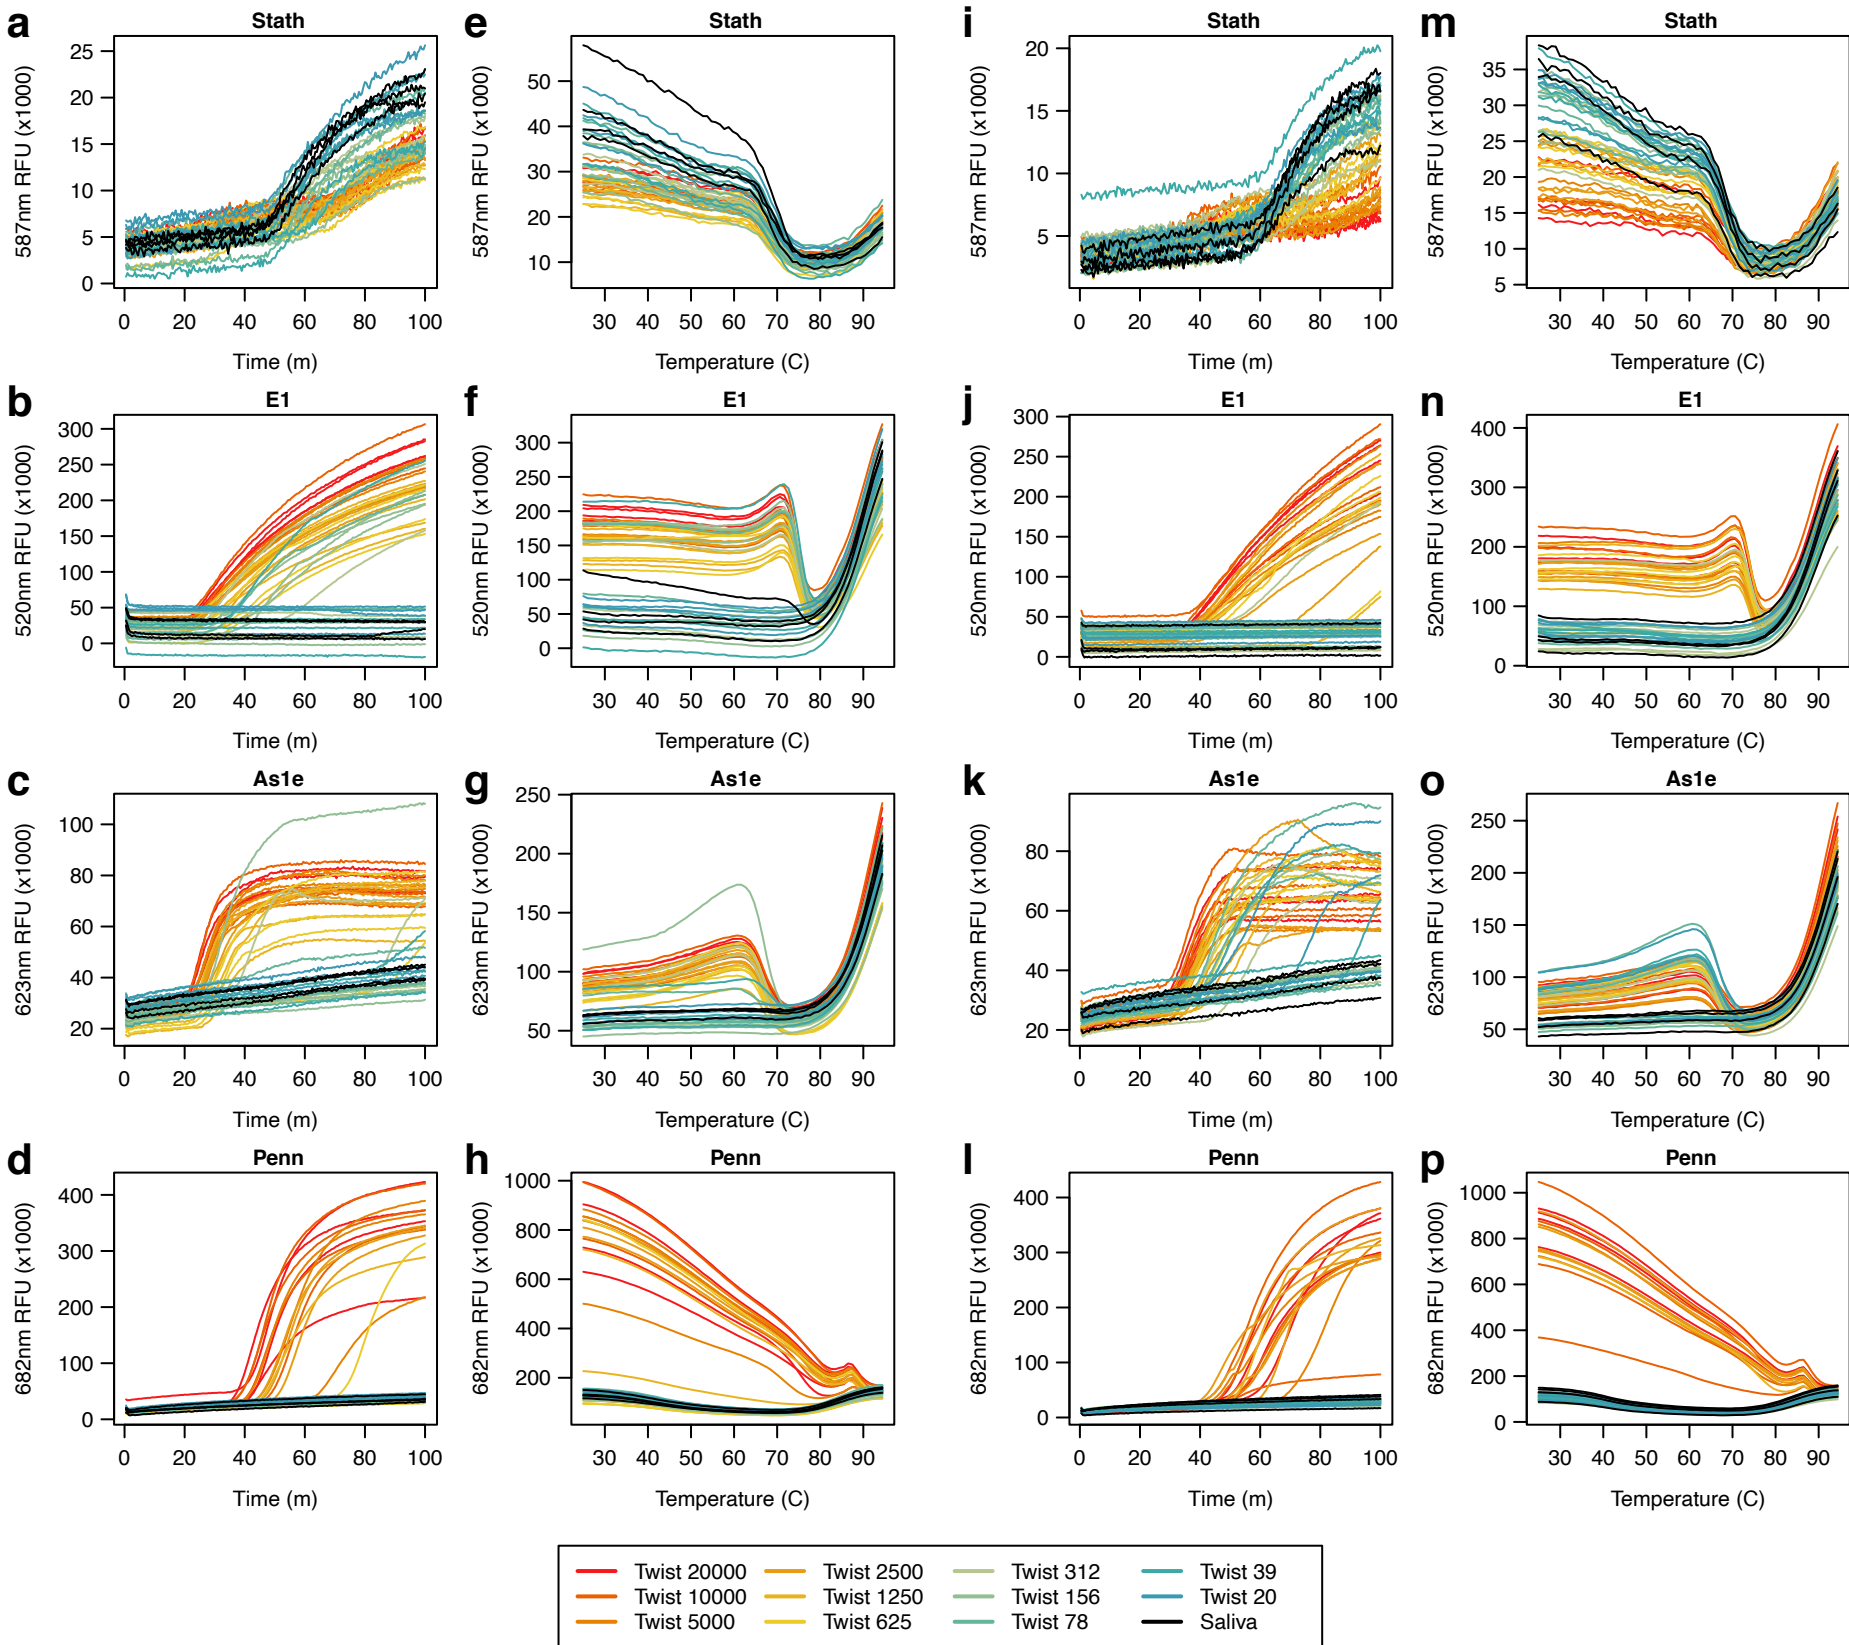

Figure S3. Comparison of laboratory-purified and commercial polymerase enzymes using a quadruplex LAMP-BEAC assay of saliva samples spiked with synthetic SARS-CoV-2 RNA. Assays were carried out using an amplicon to detect human STATH RNA (A) and three amplicons to detect SARS-CoV-2 (B-D). For these assays, synthetic SARS-CoV-2 RNA was diluted into saliva (inactivated as described[9]); copies per microliter are shown by the color code in the lower right. For A-D, the x-axis shows time after starting the assay, and the y-axis shows fluorescence intensity. E-H shows melt curve analysis for samples in A-D. For E-H, the x-axis shows temperature, and the y-axis shows fluorescence intensity. (I-P) Assays are exactly as in A-H, but commercial reverse transcriptase and DNA polymerase (NEB Warm Start LAMP Kit master mix product number E1700L) were used instead of the locally designed and purified polymerases.
